# Supplementary material for: Design, synthesis, and multi-target anticancer evaluation of 1,3-thiazolodin-4-one analogues against breast cancer: mechanistic insights into estrogen metabolism, inflammation, angiogenesis, and oxidative stress
Source: Royal Society of Chemistry journal article supplement (doi:10.1039/d5ra07680c), 2026-01-01
Supplement: d5ra07680c1.pdf [file d5ra07680c1.pdf]

## **Supporting Information**

**Table S1:** Summary of IC<sub>50</sub> values for the antiproliferative activity of the synthesized compounds (2-7) and doxorubicin toward MCF-7, MDA-MB 231, and MCF-10A cells.

| Compd. No.  | IC <sub>50</sub> (μM) |            |              |
|-------------|-----------------------|------------|--------------|
|             | MCF-7                 | MDA-MB 231 | MCF-10A      |
| Compd. 2    | 26.21±1.93            | 9.41± 0.75 | --           |
| Compd. 3    | 49.59±1.85            | 30.16±1.73 | --           |
| Compd. 4    | 9.672±1.14            | 12.55±0.87 | --           |
| Compd. 5    | 28.33±2.16            | 19.44±0.73 | --           |
| Compd. 6    | 6.702±0.63            | 2.256±0.18 | 36.57±1.37   |
| Compd. 7    | 9.276±0.62            | 12.47±1.55 | --           |
| Doxorubicin | 17.77±1.57            | 3.72±0.24  | 14.22 ± 0.53 |

**Table S2.** Docking results of compound **6** compared to native co-crystallized ligands with selected targets

|                                | Native co-crystallized ligand |      |                                                  |                                                                                        | Compound 6 |                  |                                   |
|--------------------------------|-------------------------------|------|--------------------------------------------------|----------------------------------------------------------------------------------------|------------|------------------|-----------------------------------|
|                                | Delta G                       | RMSD | residues                                         | Interaction                                                                            | Delta G    | residues         | Interaction                       |
| <b>Aromatase</b>               | -8.01                         | 0.20 | Arg115<br>Met374                                 | H-bond<br>H-bond                                                                       | -7.82      | Arg115<br>Met374 | H-bond<br>H-bond                  |
| <b>Steroid Sulfatase (STS)</b> | -                             | -    | -                                                | -                                                                                      | -6.81      | Phe233           | Pi-sulfur                         |
| <b>COX-1</b>                   | -7.48                         | 0.15 | Arg120<br>Tyr355                                 | Salt bridge<br>H-bond                                                                  | -6.57      | Arg120<br>Tyr355 | H-bond and Pi cation<br>Pi-sulfur |
| <b>COX-2</b>                   | -8.30                         | 0.83 | Gln192<br>Phe518<br>Gly526<br>Ser353             | H-bond<br>H-bond<br>amide-Pi stacking<br>Pi-sigma                                      | -6.98      | Tyr355<br>Trp387 | Pi-sulfur<br>Pi-sulfur            |
| <b>VEGFR2</b>                  | -10.20                        | 0.48 | Glu883<br>Cys917<br>Asp1044<br>Cys1043<br>Phe916 | 2 H-bonds<br>2 H-bonds + Pi-sulfur<br>H-bond + Pi-anion<br>Pi-sulfur<br>Pi-Pi stacking | -7.87      | Cys1043          | Pi-sulfur                         |
| <b>TNF-<math>\alpha</math></b> | -6.25                         | 0.35 | Tyr59<br>Tyr151                                  | Pi-Pi stacking<br>H-bond                                                               | -5.34      | Tyr59<br>Tyr151  | Pi-sulfur<br>H-bond               |

The redocking of co-crystallized ligands yielded RMSD values below 1.0 Å for all targets, validating the reliability of the docking protocol (Table S1). The hit compound demonstrated favorable binding energies and significant molecular interactions across all tested targets. Among these, the strongest binding affinity was observed with VEGFR2 (−7.87 kcal/mol), followed by Aromatase (−7.82 kcal/mol), and COX-2 (−6.98 kcal/mol). In contrast, the weakest interaction was recorded with TNF- $\alpha$  (−5.34 kcal/mol).

**Table S3.** pkCSM-predicted toxicity parameters for compound **6**, summarizing genotoxicity, cardiotoxicity (hERG I/II), skin sensitization, systemic tolerance (MTD), acute and chronic toxicity estimates (LD<sub>50</sub> and LOAEL), and environmental toxicity indices (*T. pyriformis* and minnow toxicity).

| Toxicity Parameter                             | Prediction / Value        | Type                    | Interpretation                  |
|------------------------------------------------|---------------------------|-------------------------|---------------------------------|
| Ames mutagenicity                              | No                        | Categorical<br>(Yes/No) | Non-mutagenic                   |
| hERG I inhibitor                               | No                        | Categorical<br>(Yes/No) | No predicted<br>cardiotoxicity  |
| hERG II inhibitor                              | No                        | Categorical<br>(Yes/No) | No predicted<br>cardiotoxicity  |
| Maximum tolerated dose<br>(human)              | 0.265 log mg/kg/day       | Numeric                 | Moderate tolerance in<br>humans |
| Oral Rat Acute Toxicity<br>(LD <sub>50</sub> ) | 2.917 mol/kg              | Numeric                 | Low acute toxicity              |
| Oral Rat Chronic Toxicity<br>(LOAEL)           | 1.214 log<br>mg/kg_bw/day | Numeric                 | Low chronic toxicity            |
| Skin Sensitisation                             | No                        | Categorical<br>(Yes/No) | Non-sensitizing                 |
| <i>T. pyriformis</i> toxicity                  | 0.504 log µg/L            | Numeric                 | Minimal aquatic toxicity        |
| Minnow toxicity                                | 0.717 log mM              | Numeric                 | Minimal ecotoxicity             |

**Table S4.** ProTox-III–predicted toxicity endpoints for compound **6**, including organ toxicity, carcinogenicity, mutagenicity, immunotoxicity, cytotoxicity, BBB penetration, ecotoxicity, and inhibitory activity toward major CYP450 enzymes.

| Category                                            | Endpoint        | Shorthand | Prediction | Probability | Interpretation                |
|-----------------------------------------------------|-----------------|-----------|------------|-------------|-------------------------------|
| <b>Organ</b>                                        | Hepatotoxicity  | DILI      | Inactive   | 0.59        | No predicted liver toxicity   |
| <b>Toxicity</b>                                     | Cardiotoxicity  | CARDIO    | Inactive   | 0.60        | No predicted heart toxicity   |
| <b>Toxicity</b>                                     | Carcinogenicity | CARCINO   | Inactive   | 0.60        | Non-carcinogenic              |
| <b>Endpoints</b>                                    | Immunotoxicity  | IMMUNO    | Active     | 0.53        | Possible mild IM effect       |
|                                                     | Mutagenicity    | MUTAGEN   | Inactive   | 0.57        | Non-mutagenic                 |
|                                                     | Cytotoxicity    | CYTO      | Inactive   | 0.68        | Non-cytotoxic to normal cells |
|                                                     | BBB-barrier     | BBB       | Inactive   | 0.55        | Limited CNS penetration       |
|                                                     | Ecotoxicity     | ECO       | Inactive   | 0.59        | Non-ecotoxic                  |
| <b>Metabolism</b><br><b>(CYP</b><br><b>Enzymes)</b> | CYP1A2          | CYP1A2    | Inactive   | 0.94        | No inhibition predicted       |
|                                                     | CYP2C19         | CYP2C19   | Inactive   | 0.78        | No inhibition predicted       |
|                                                     | CYP2C9          | CYP2C9    | Inactive   | 0.64        | No inhibition predicted       |
|                                                     | CYP2D6          | CYP2D6    | Inactive   | 0.69        | No inhibition predicted       |
|                                                     | CYP3A4          | CYP3A4    | Inactive   | 0.80        | No inhibition predicted       |
|                                                     | CYP2E1          | CYP2E1    | Inactive   | 0.99        | No inhibition predicted       |

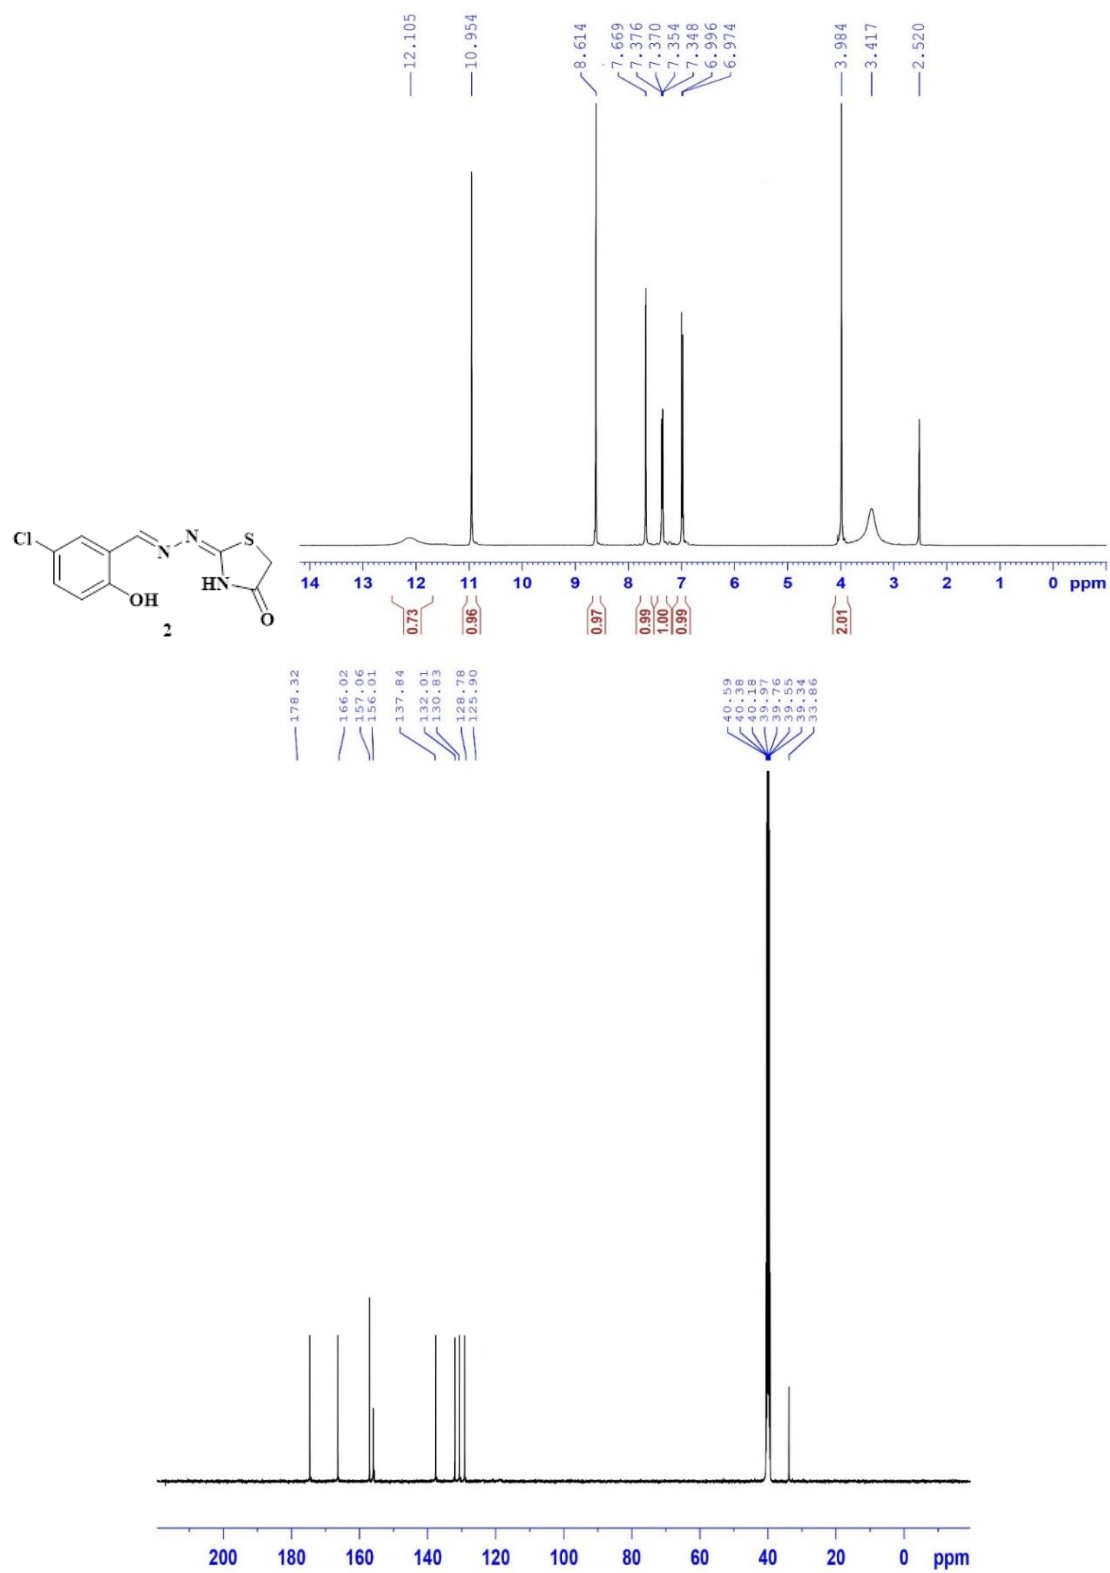

Figure S1A: <sup>1</sup>H- and <sup>13</sup>C-NMR Spectrum of Compound 2

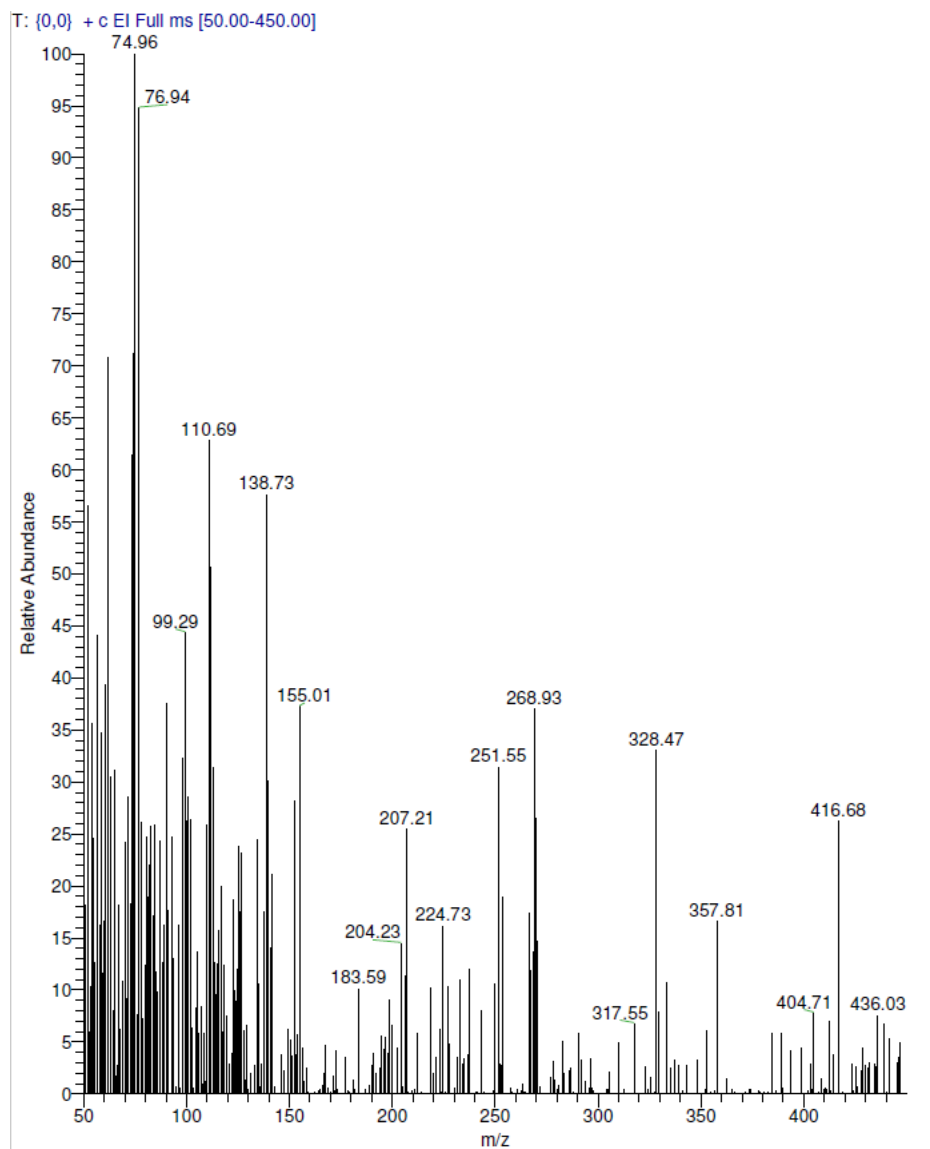

**Figure S1B:** ESI-MS analysis of Compound **2**

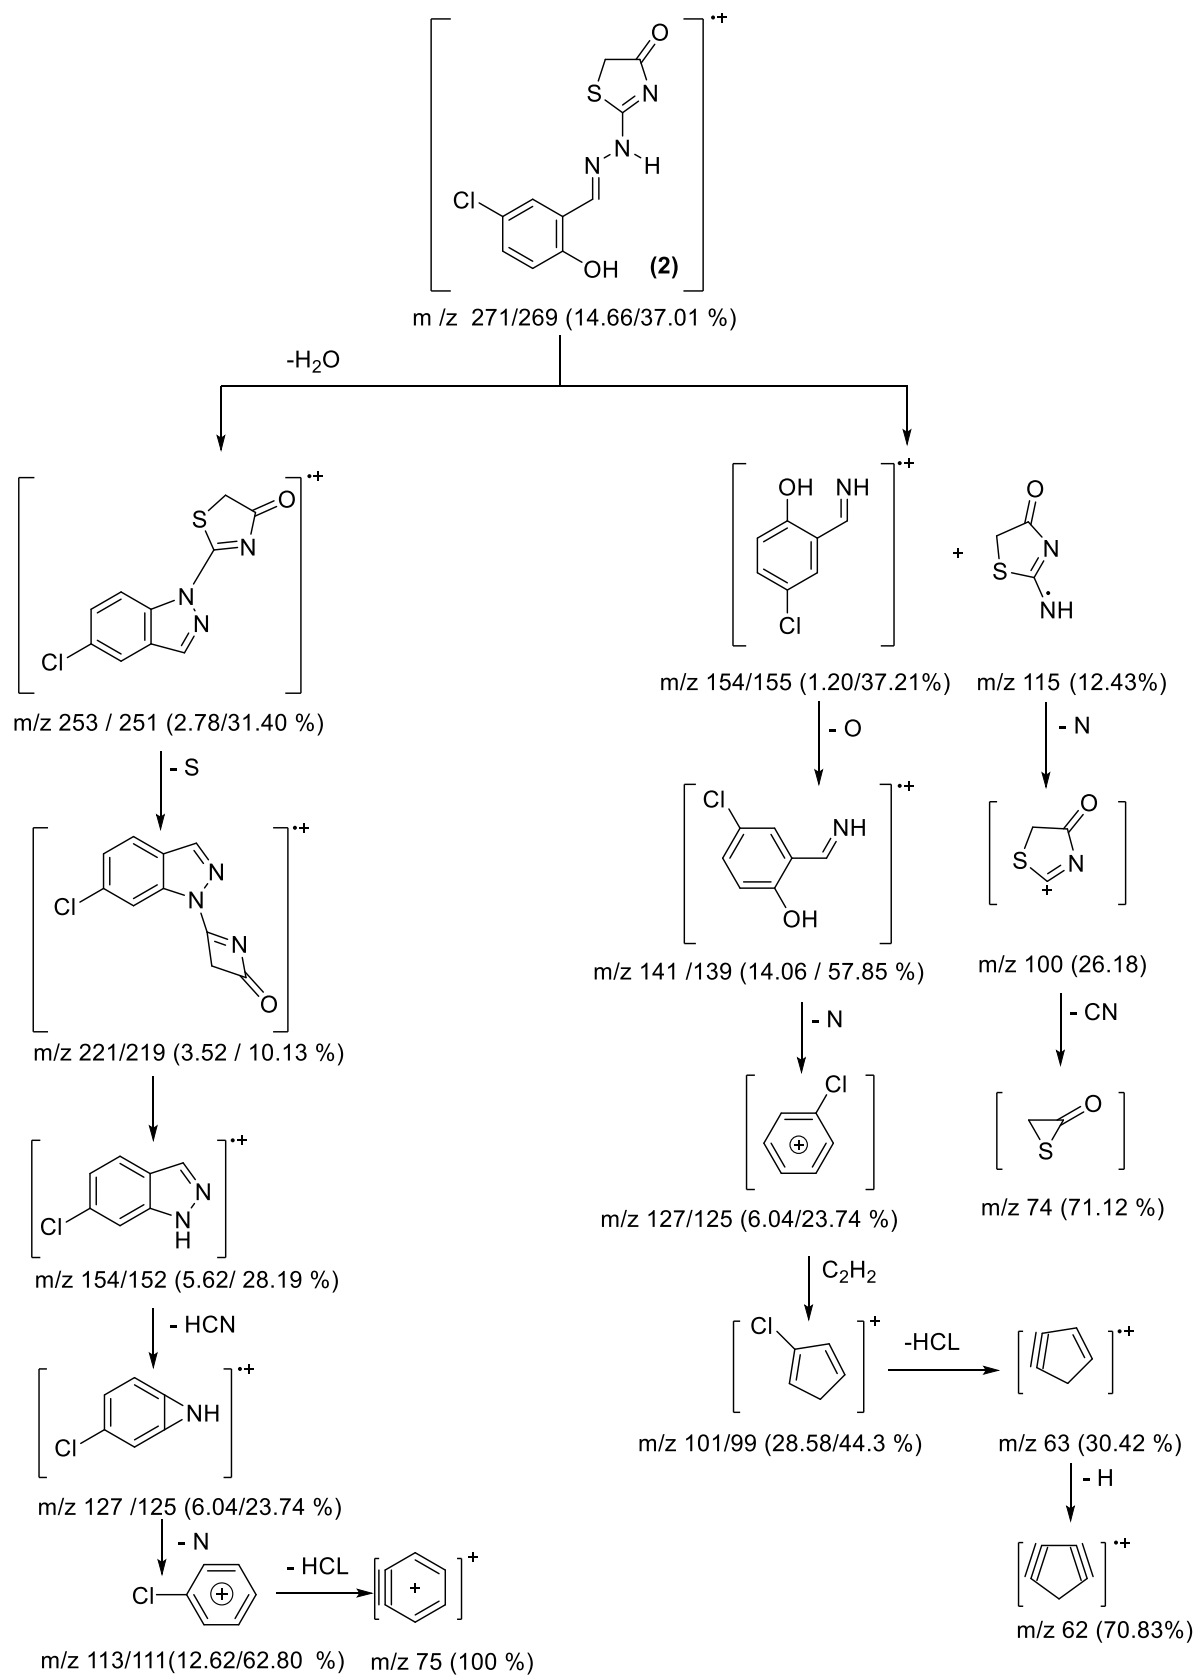

**Figure S1C:** Mass fragmentation pattern of Compound **2**



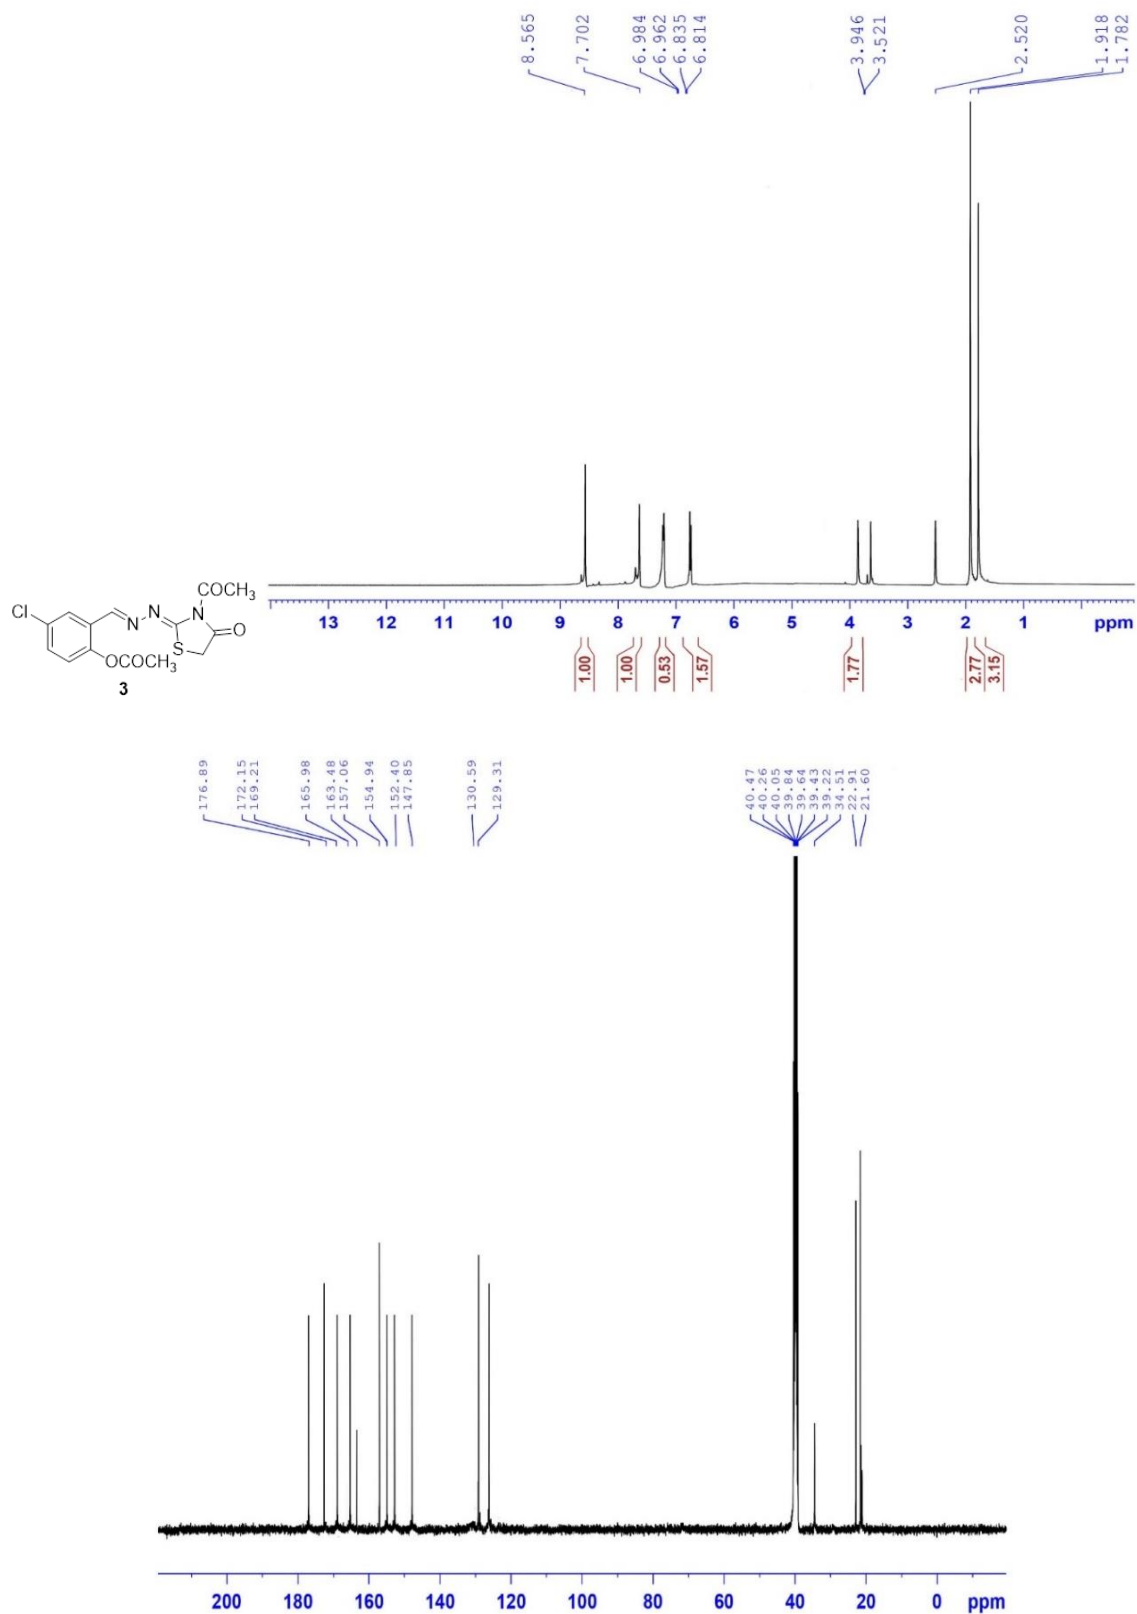

Figure S2A: <sup>1</sup>H- and <sup>13</sup>C-NMR Spectrum of Compound 3

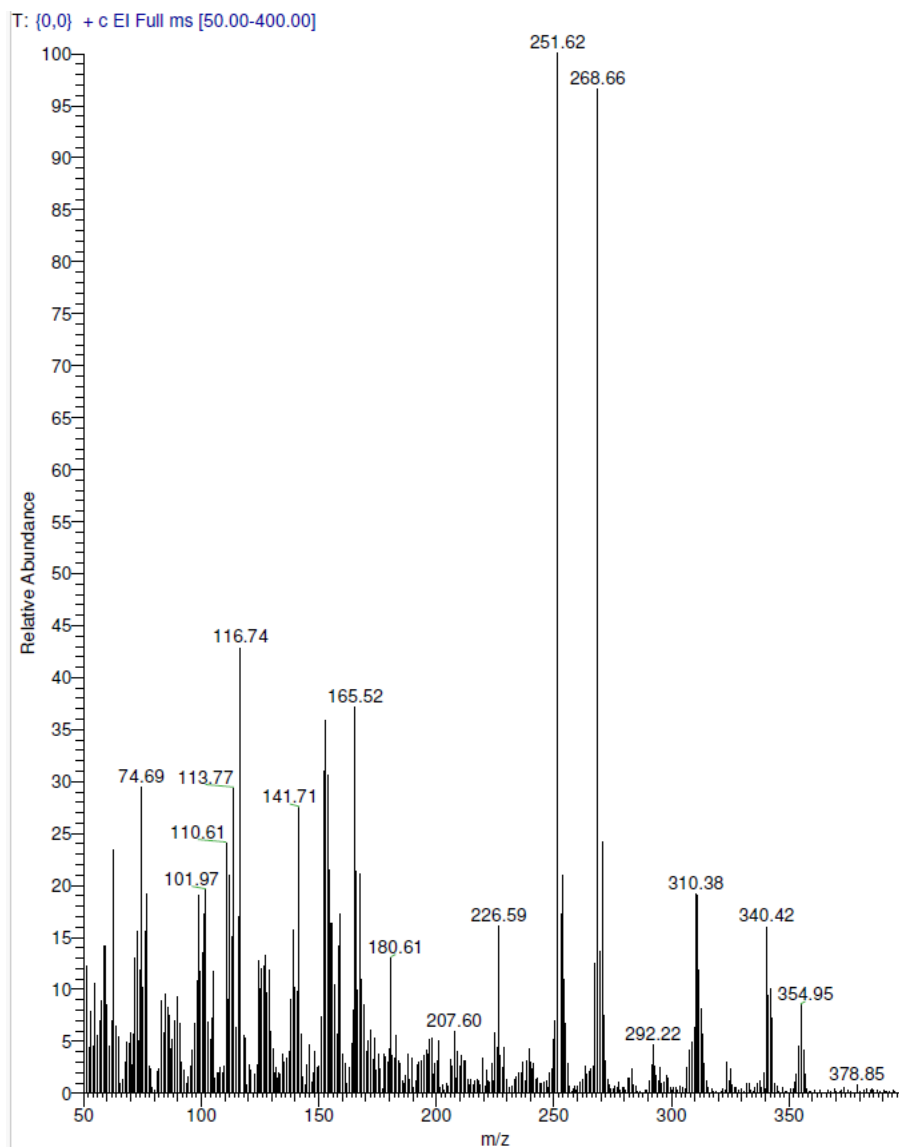

**Figure S2B:** ESI-MS analysis of Compound **3**

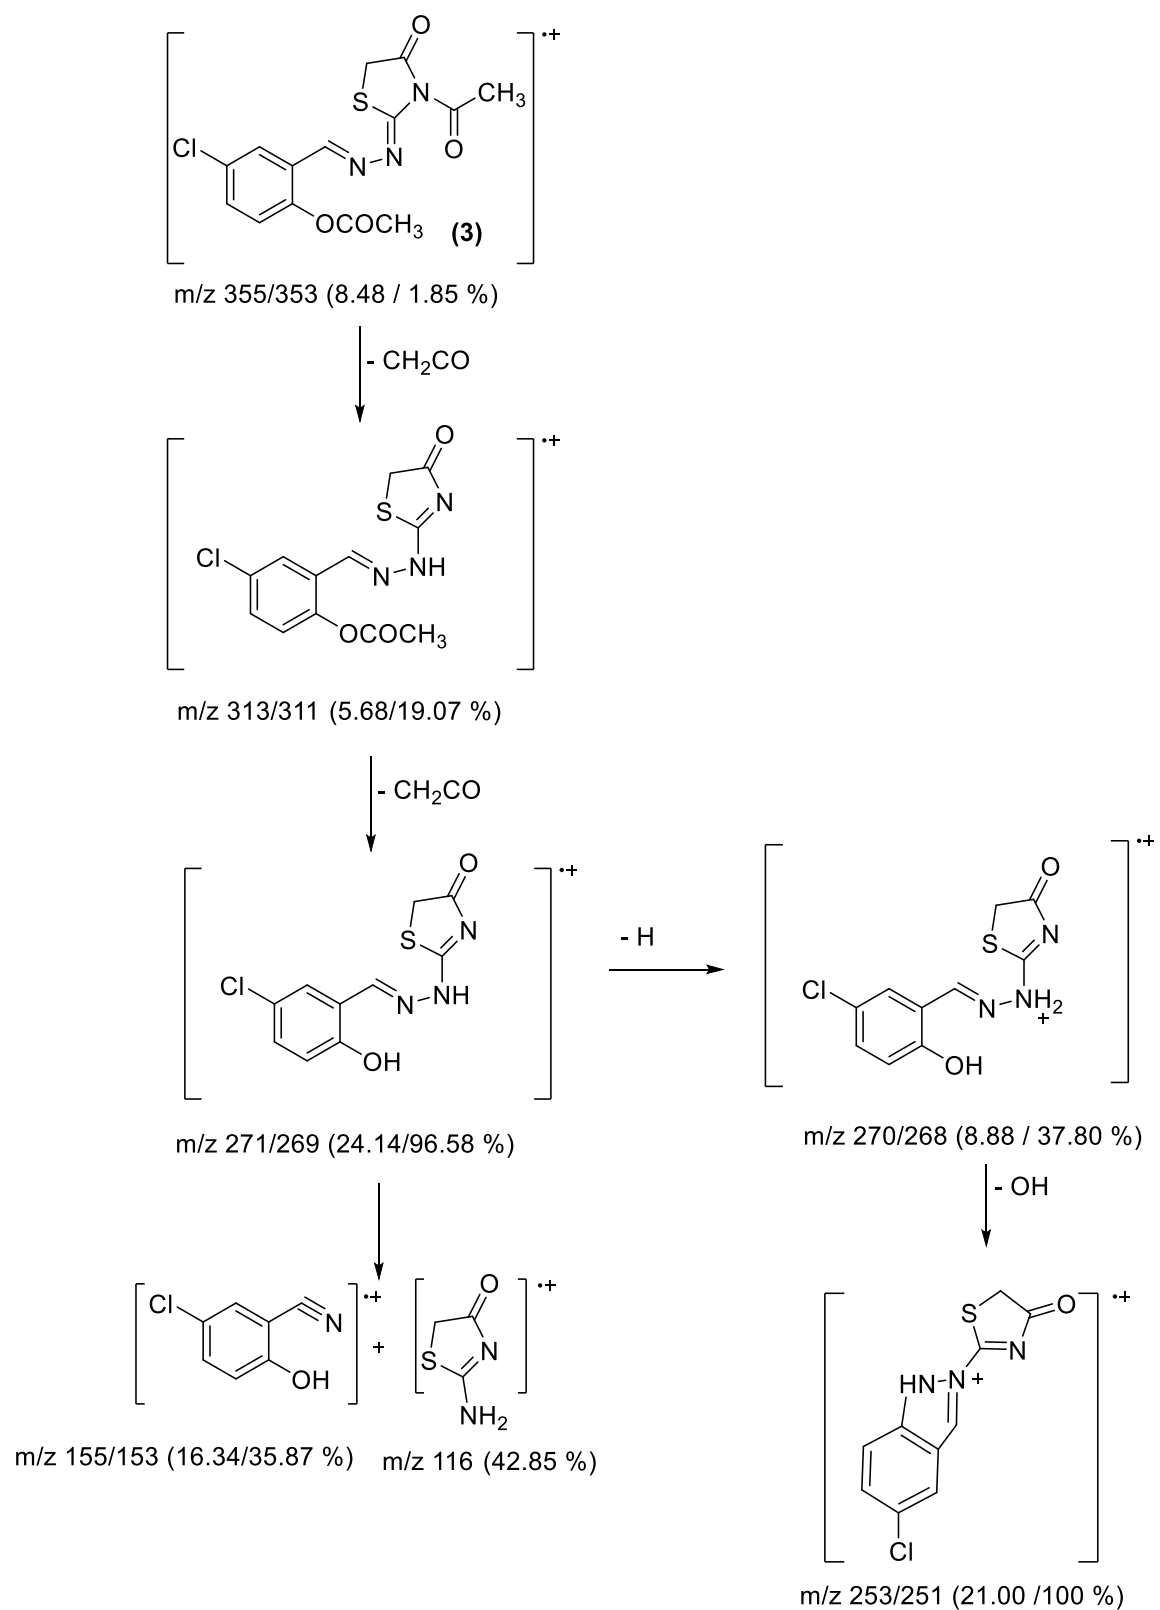

**Figure S2C:** Mass fragmentation pattern of Compound 3

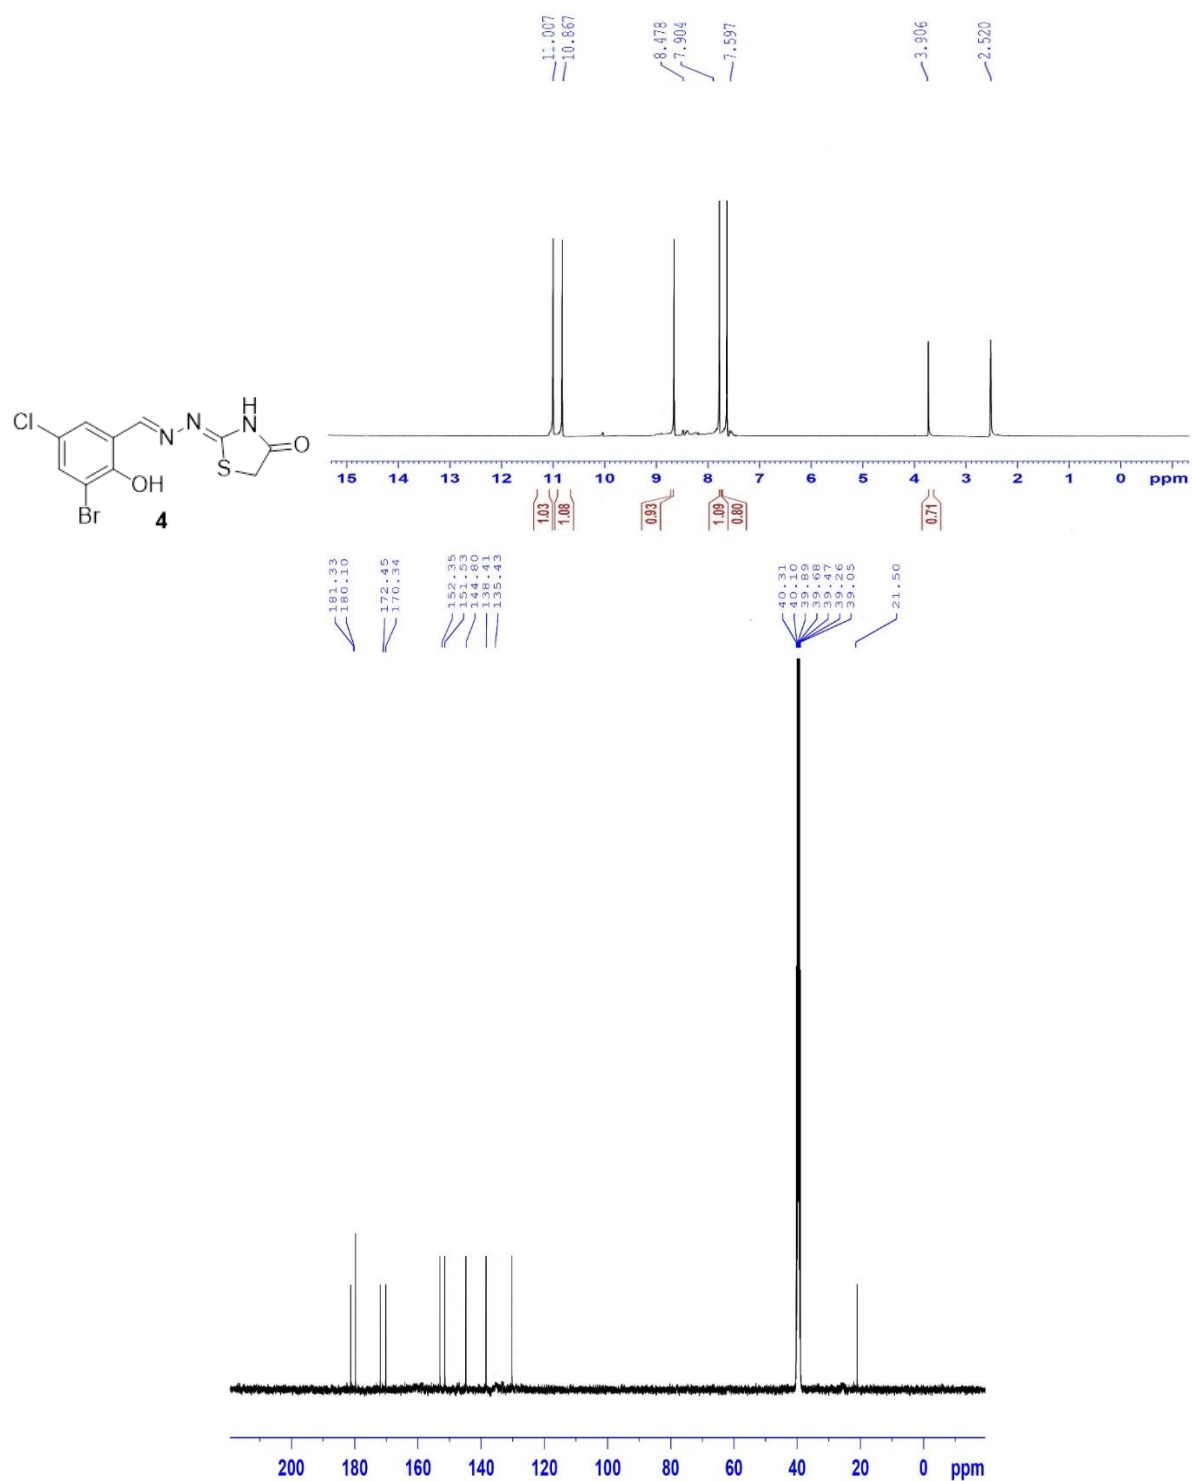

Figure S3: <sup>1</sup>H- and <sup>13</sup>C-NMR Spectrum of compound 4

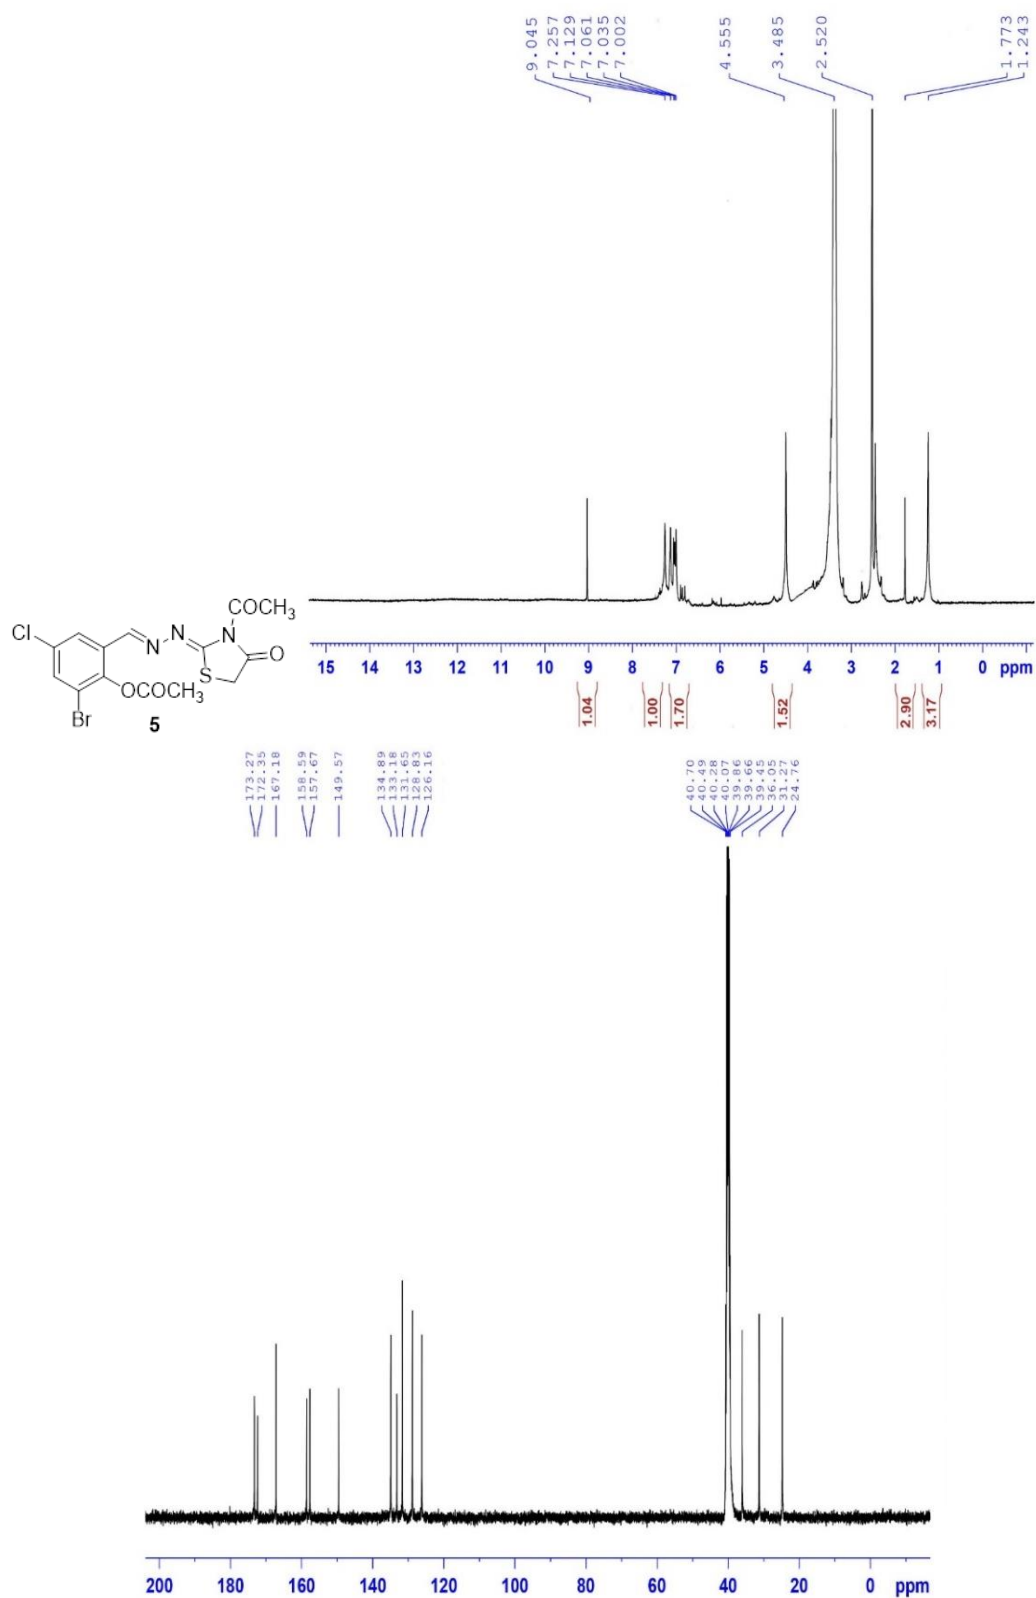

Figure S4: <sup>1</sup>H- and <sup>13</sup>C-NMR Spectrum of Compound 5

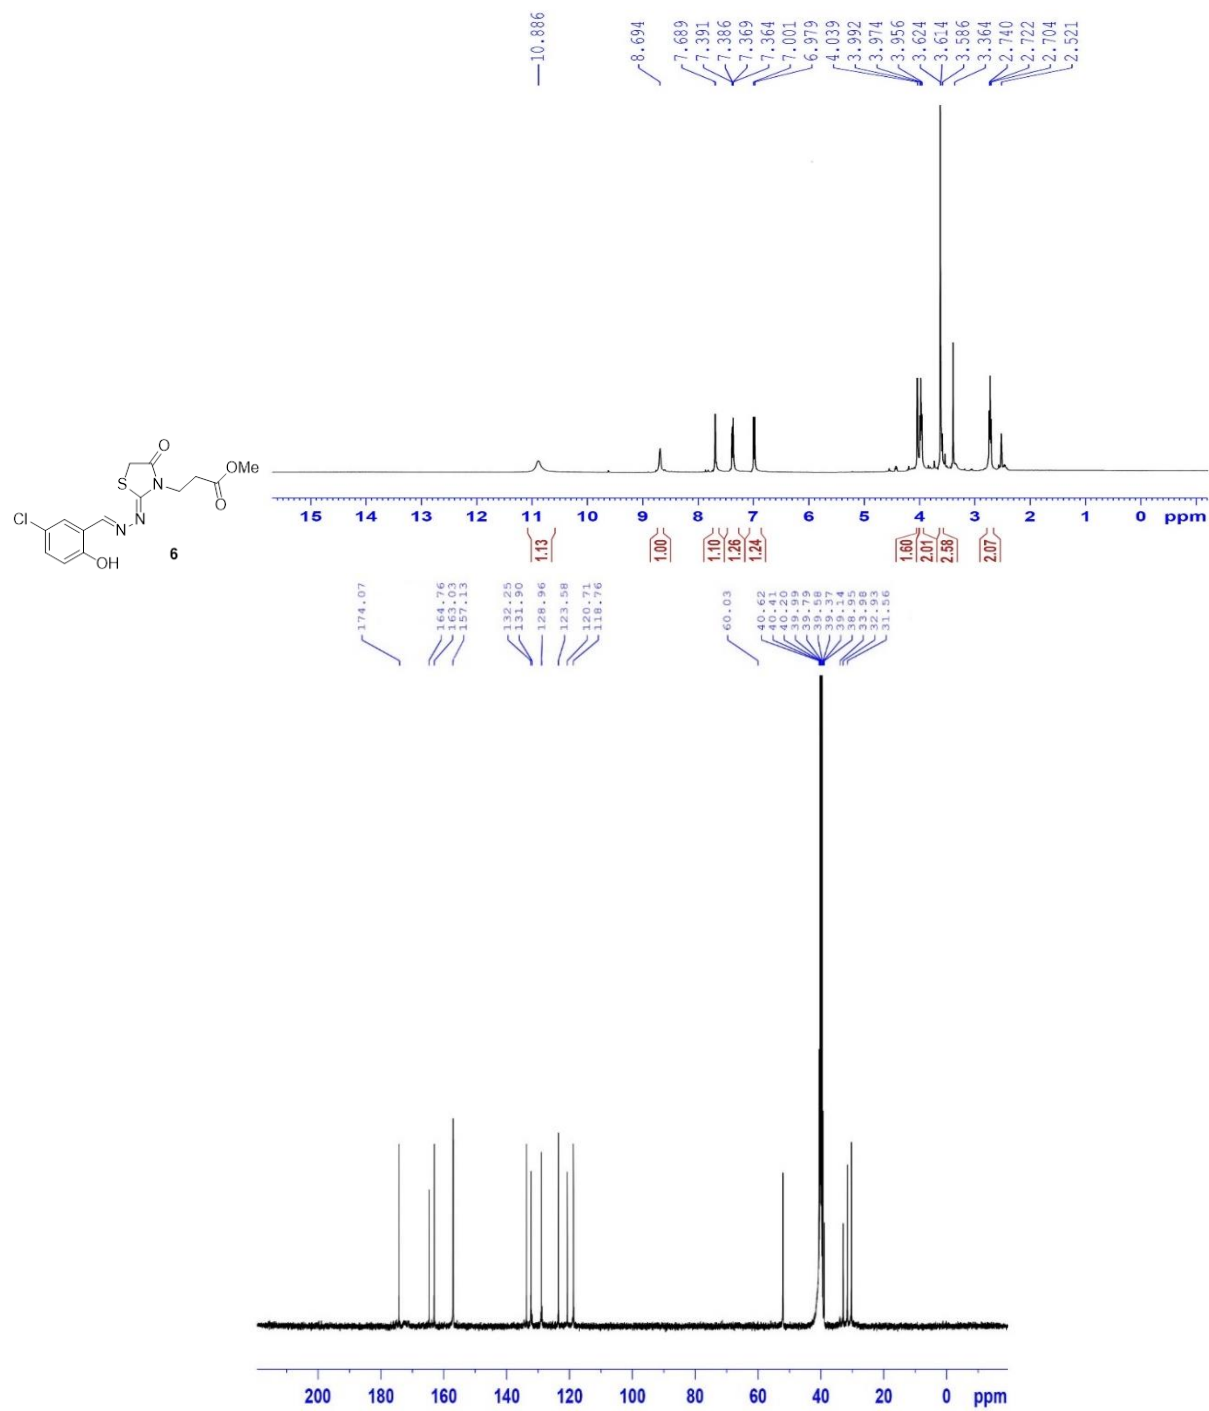

**Figure S5:** <sup>1</sup>H- and <sup>13</sup>C-NMR Spectrum of Compound 6

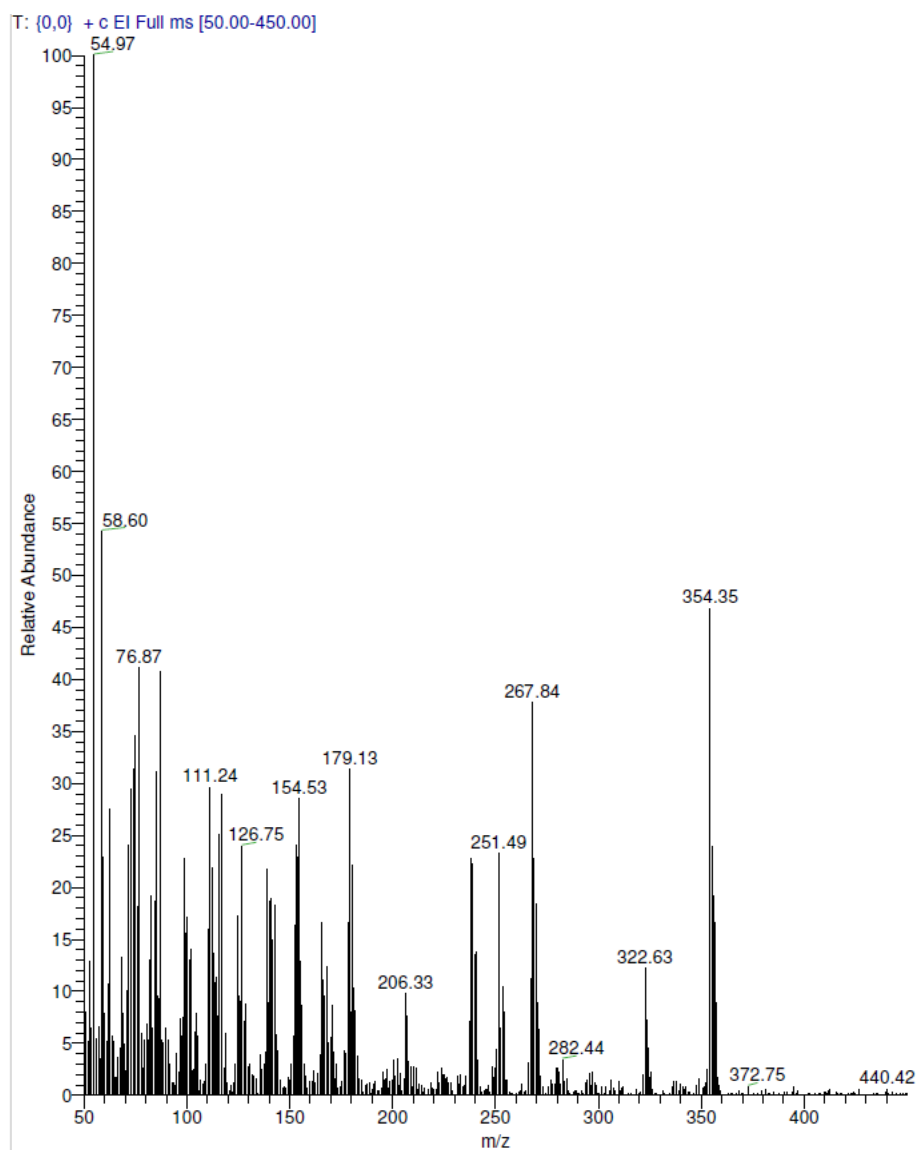

**Figure S5B:** ESI-MS analysis of Compound **6**

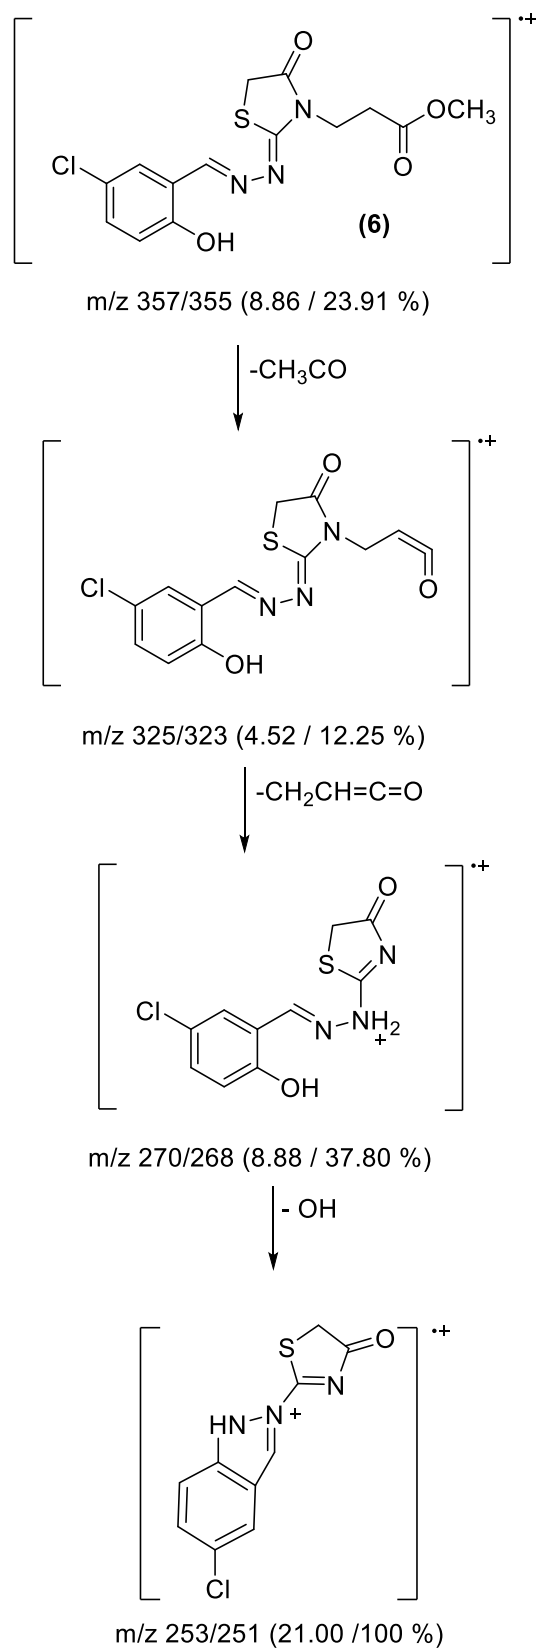

**Figure S5C:** Mass fragmentation pattern of Compound **6**



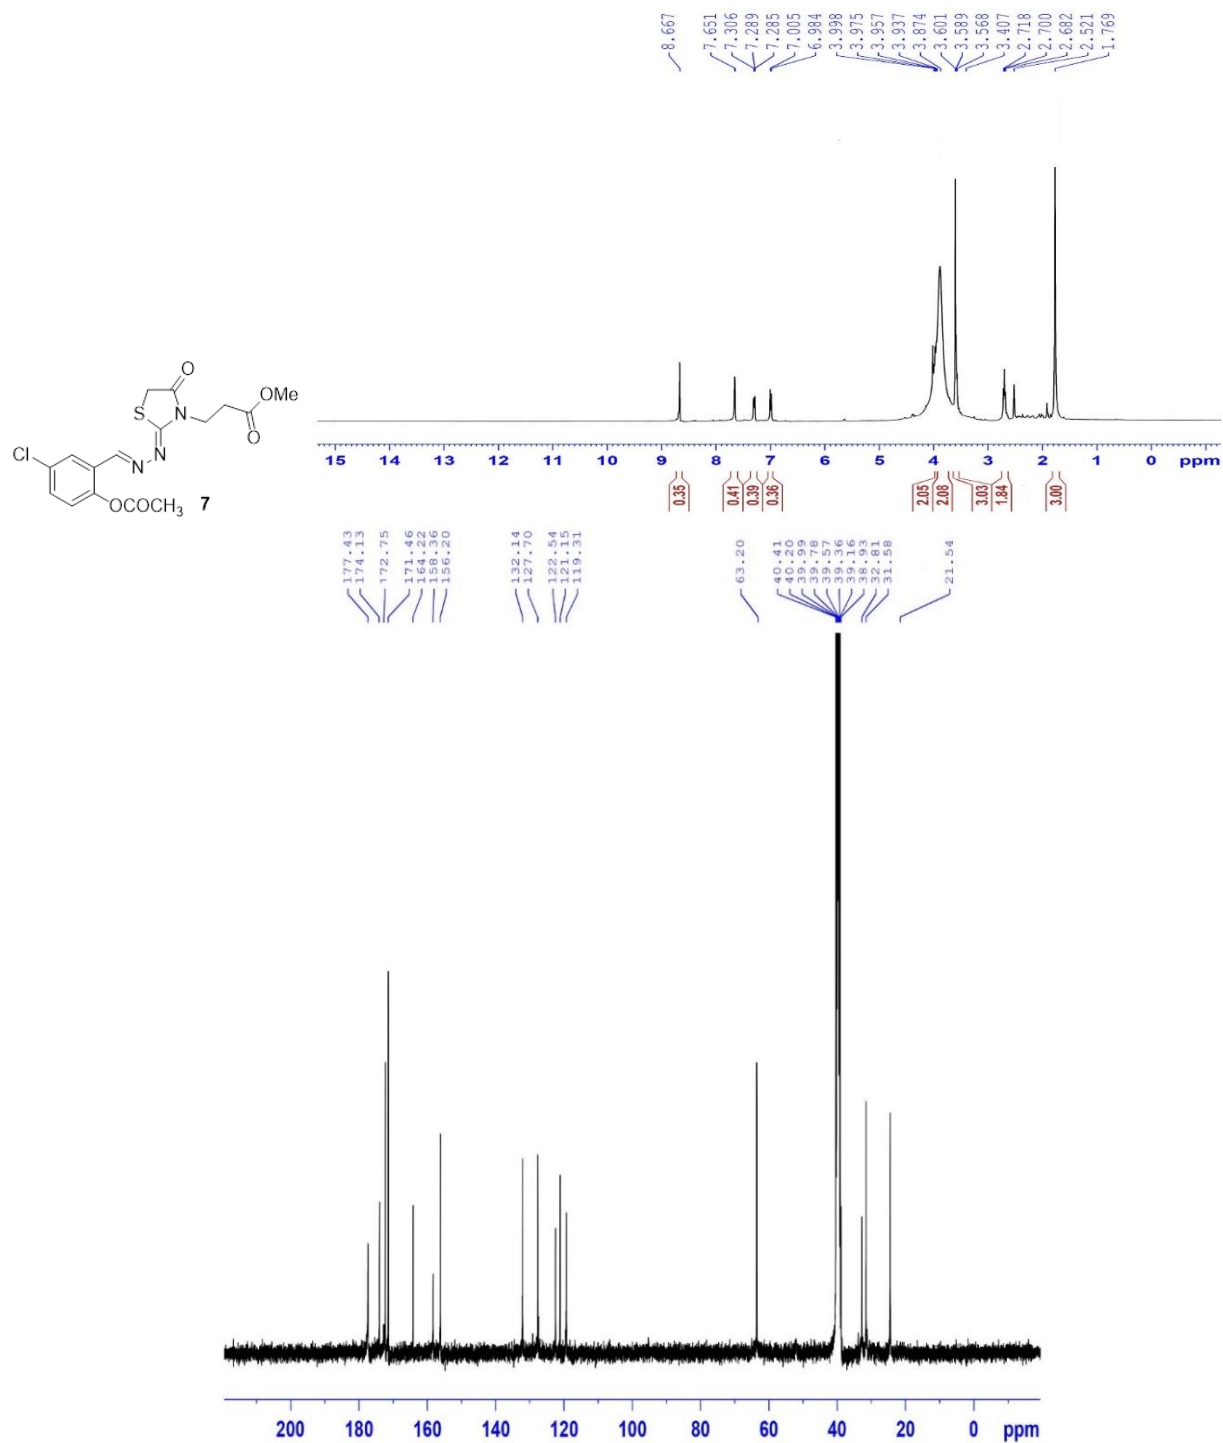

Figure S6: <sup>1</sup>H- and <sup>13</sup>C-NMR Spectrum of Compound 7

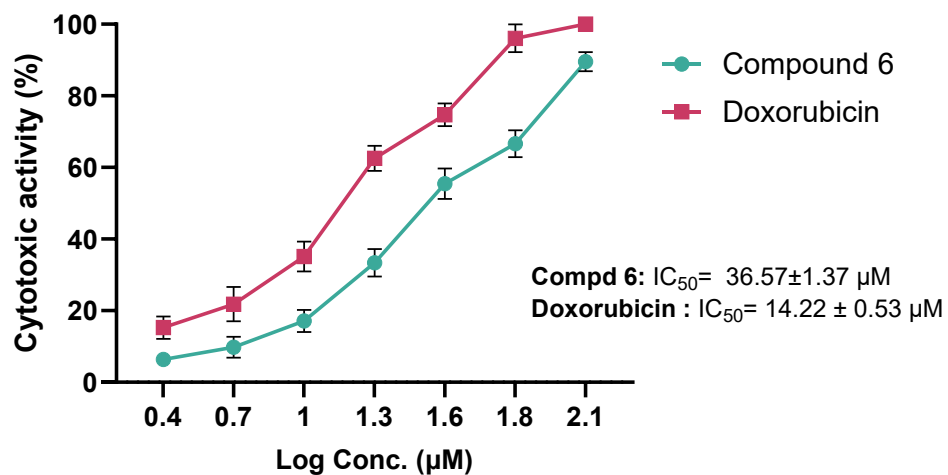

**Figure S7:** Effect of compound 6 and doxorubicin against non-tumorigenic MCF-10A cells as assessed by MTT assay after incubation for 48h at different concentrations.

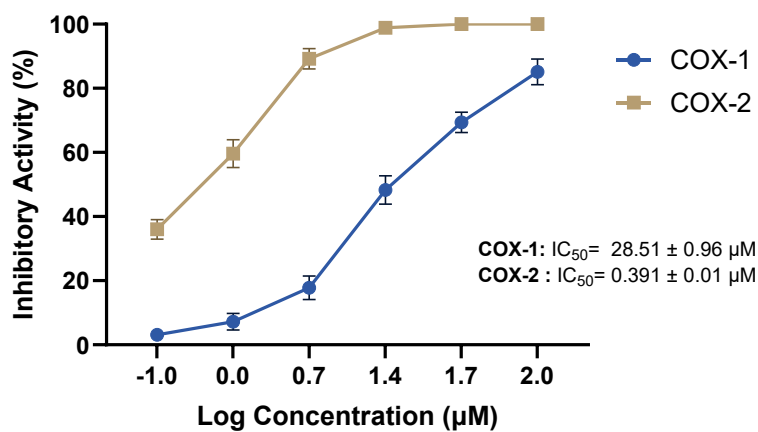

**Figure S8:** Dose-response inhibitory potential of celecoxib toward the activity of COX-1 and COX-2 proteins. Data expressed as mean±SE from three independent experiments (n = 3).

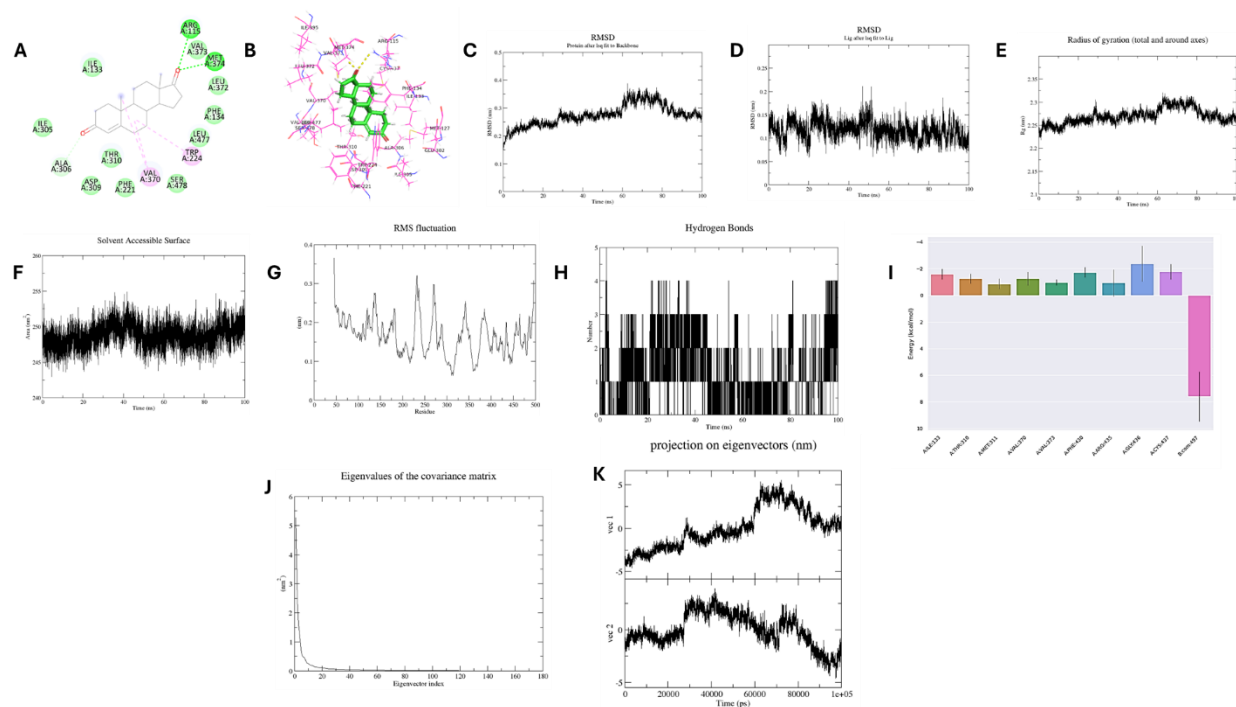

**Figure S9: Molecular modelling, molecular dynamics, and principal component analysis of docked ligands with aromatase protein (PDB ID: 3EQM).** (A, B) 2D and 3D interaction diagrams of the co-crystallized ligand with the aromatase protein. (C-E) Structural dynamics of aromatase protein calculated during the 100 ns of MD trajectories; Root Mean Square deviation (RMSD) of aromatase (C), Ligand RMSD (D), Radius of gyration (E), complexes SASA values (F); Root Mean Square fluctuation (RMSF) of protein backbone (G), number of H-bonds formed with compound **6** (H), and Residue-binding-free energy decomposition for the simulated complex (E). (J-K) Principal component analysis and free energy landscape of the Aromatase–compound **6** complex. (J) Eigenvalue distribution of the covariance matrix, illustrating the dominant modes of motion. (K) Time evolution of the projections along PC1 and PC2 over the 100-ns trajectory.

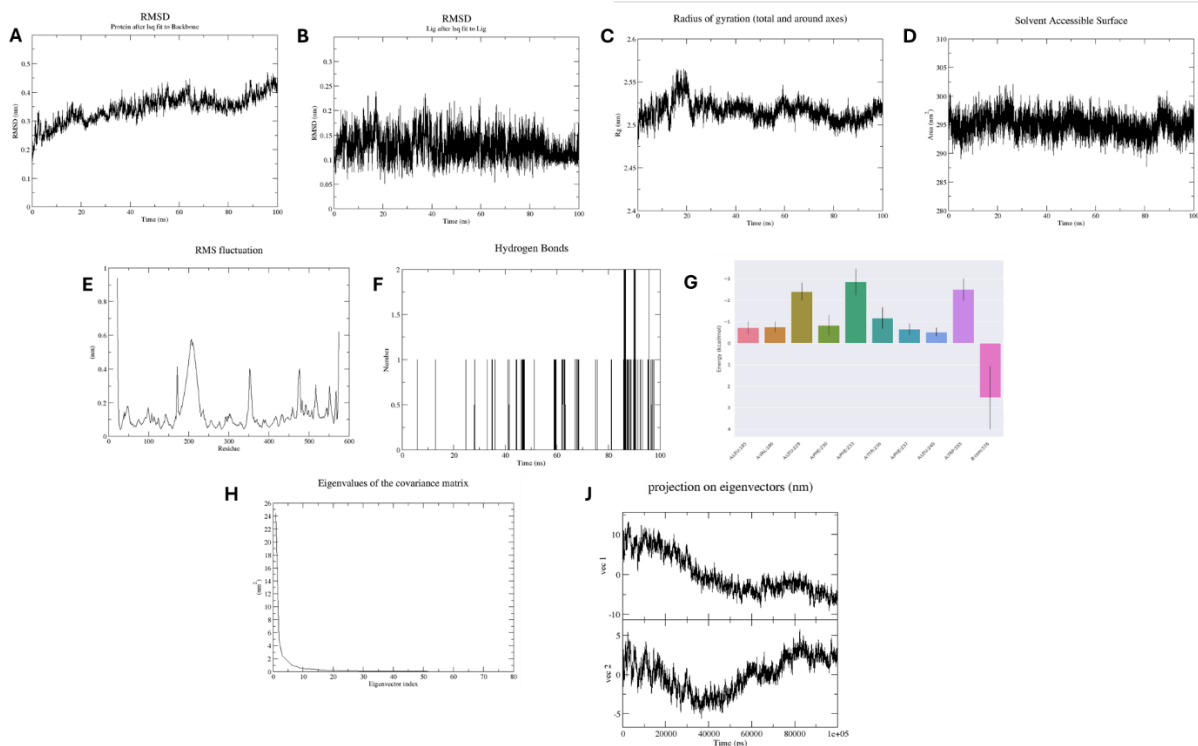

**Figure S10: Molecular dynamics analysis of compound 6 with Steroid Sulfatase (STS) protein (PDB ID: 1P49).** (A-G) Structural dynamics of STS protein calculated during the 100 ns of MD trajectories; Root Mean Square deviation (RMSD) of STS (A), Ligand RMSD (B), Radius of gyration (C), complexes SASA values (D); Root Mean Square fluctuation (RMSF) of protein backbone (E), number of H-bonds formed with compound 6 (F), and Residue-binding-free energy decomposition for the simulated complex (G). (H-I) Principal component analysis and free energy landscape of STS–compound 6 complex. (H) Eigenvalue distribution of the covariance matrix, illustrating the dominant modes of motion. (I) Time evolution of the projections along PC1 and PC2 over the 100-ns trajectory.

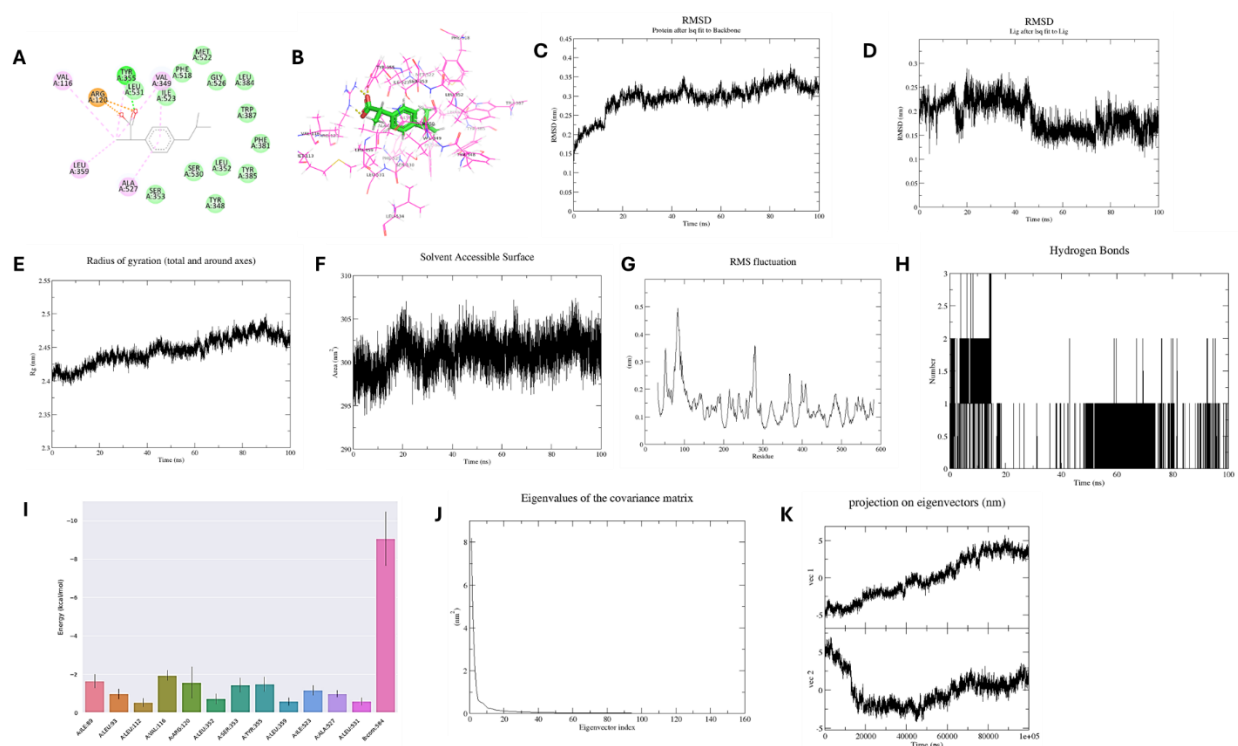

**Figure S11: Molecular modelling and molecular dynamics analysis of docked ligands with cyclooxygenase-1 (COX-1) protein (PDB ID: 1EQG).** (A, B) 2D and 3D interaction diagrams of the co-crystallized ligand with COX-1 protein. (C-I) Structural dynamics of COX-1 protein calculated during the 100 ns of MD trajectories; Root Mean Square deviation (RMSD) of COX-1 (C), Ligand RMSD (D), Radius of gyration (E), complexes SASA values (F); Root Mean Square fluctuation (RMSF) of protein backbone (G), number of H-bonds formed with compound 6 (H), and Residue-binding-free energy decomposition for the simulated complex (I). (J-K) Principal component analysis and free energy landscape of COX-1–compound 6 complex. (J) Eigenvalue distribution of the covariance matrix, illustrating the dominant modes of motion. (K) Time evolution of the projections along PC1 and PC2 over the 100-ns trajectory.

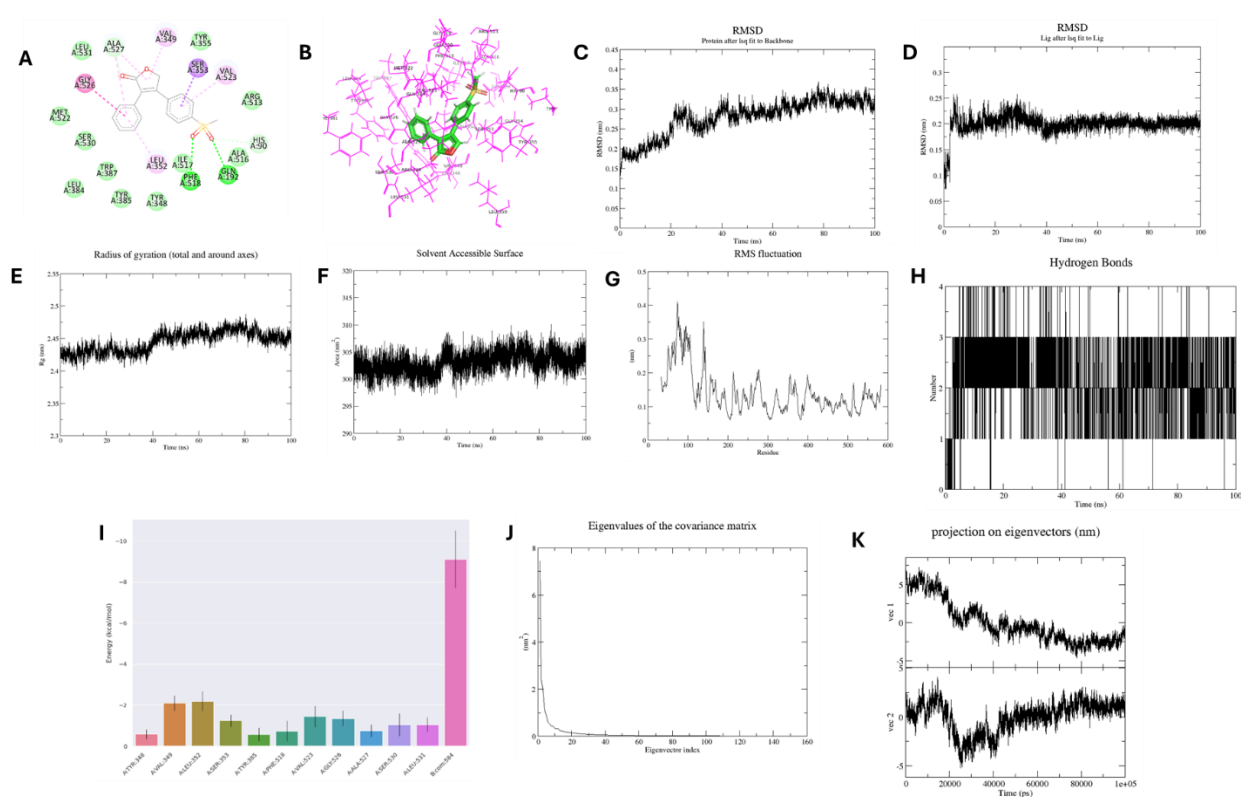

**Figure S12: Molecular modelling and molecular dynamics analysis of docked ligands with cyclooxygenase-2 (COX-2) protein (PDB ID: 5K1R).** (A, B) 2D and 3D interaction diagrams of the co-crystallized ligand with COX-2 protein. (C-I) Structural dynamics of COX-2 protein calculated during the 100 ns of MD trajectories; Root Mean Square deviation (RMSD) of COX-2 (C), Ligand RMSD (D), Radius of gyration (E), complexes SASA values (F); Root Mean Square fluctuation (RMSF) of protein backbone (G), and number of H-bonds formed with compound 6 (H), and Residue-binding-free energy decomposition for the simulated complex (I). (J-K) Principal component analysis and free energy landscape of COX-2–compound 6 complex. (J) Eigenvalue distribution of the covariance matrix, illustrating the dominant modes of motion. (K) Time evolution of the projections along PC1 and PC2 over the 100-ns trajectory.

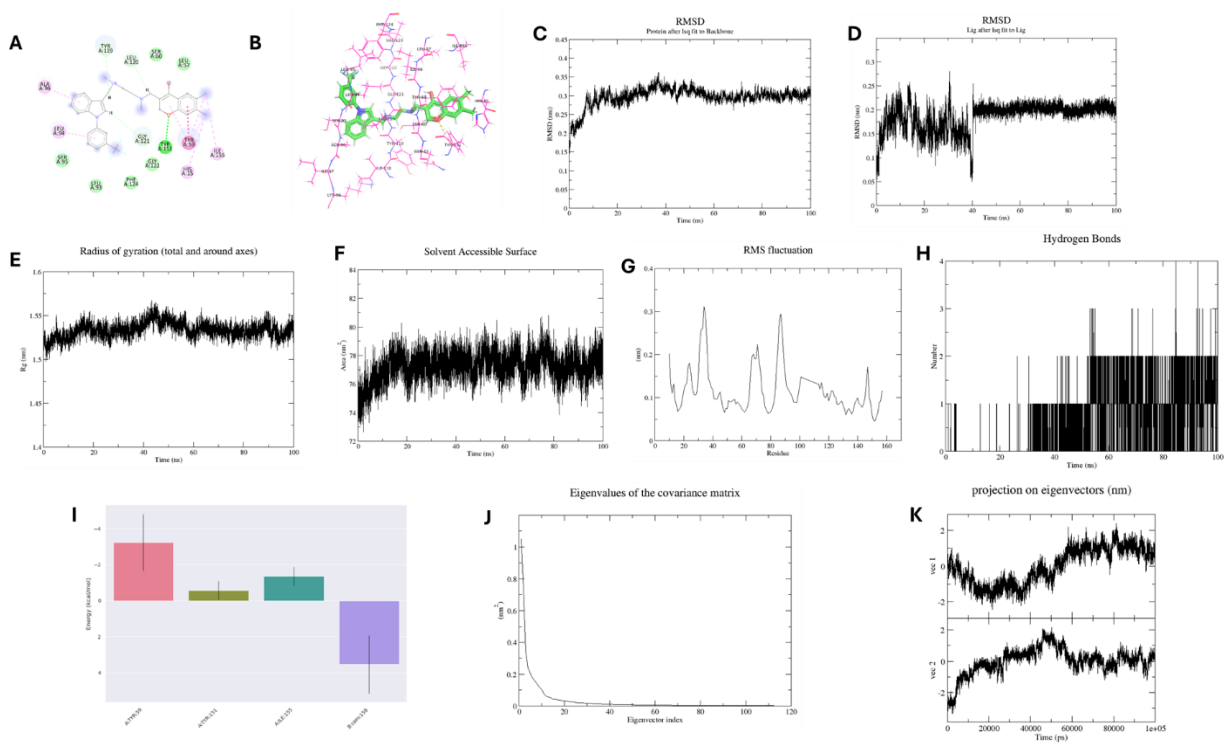

**Figure S13: Molecular modelling and molecular dynamics analysis of docked ligands with tumor necrosis factor-alpha (TNF- $\alpha$ ) protein (PDB ID: 2AZ5).** (A, B) 2D and 3D interaction diagrams of the co-crystallized ligand with TNF- $\alpha$  protein. (C-H) Structural dynamics of TNF- $\alpha$  protein calculated during the 100 ns of MD trajectories; Root Mean Square deviation (RMSD) of TNF- $\alpha$  (C), Ligand RMSD (D), Radius of gyration (E), complexes SASA values (F); Root Mean Square fluctuation (RMSF) of protein backbone (G), number of H-bonds formed with compound 6 (H), and Residue-binding-free energy decomposition for the simulated complex (I). (J-K) Principal component analysis and free energy landscape of TNF- $\alpha$ -compound 6 complex. (J) Eigenvalue distribution of the covariance matrix, illustrating the dominant modes of motion. (K) Time evolution of the projections along PC1 and PC2 over the 100-ns trajectory.

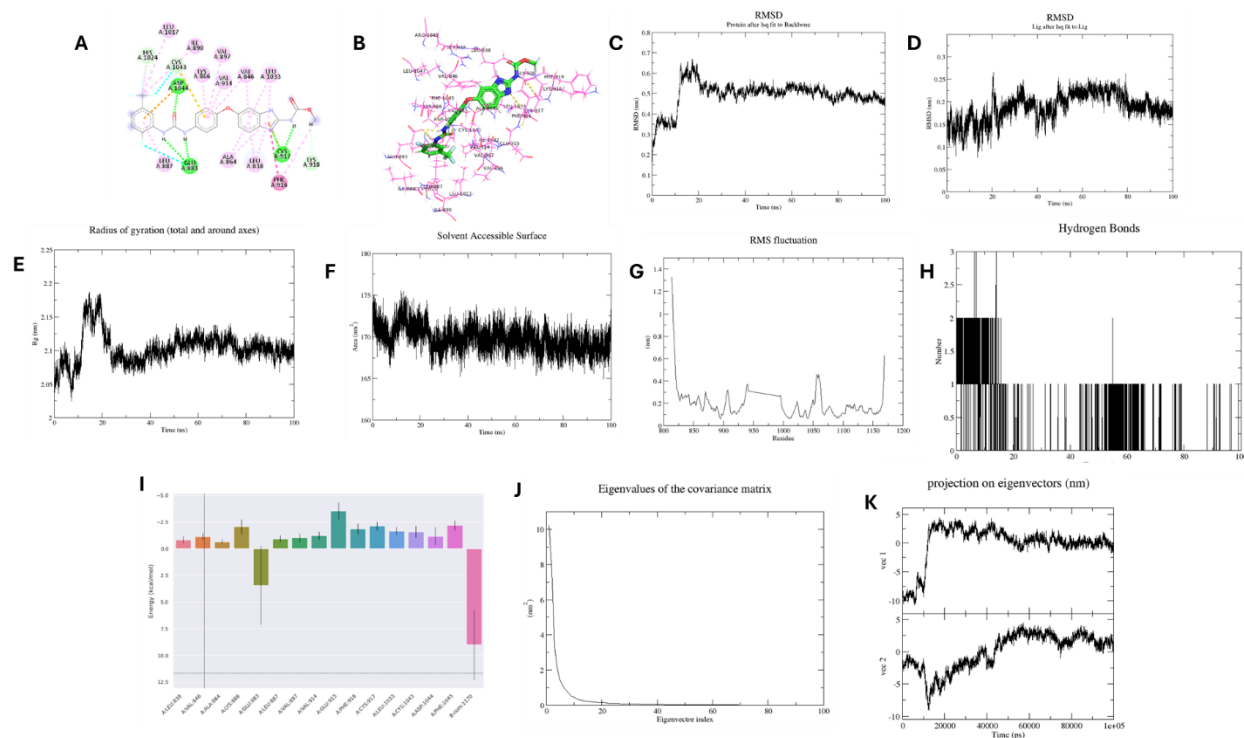

**Figure S14: Molecular modelling and molecular dynamics analysis of docked ligands with vascular endothelial growth factor receptor 2 (VEGFR2) protein (PDB ID: 2OH4).** (A, B) 2D and 3D interaction diagrams of the co-crystallized ligand with VEGFR2 protein. (C-H) Structural dynamics of VEGFR2 protein calculated during the 100 ns of MD trajectories; Root Mean Square deviation (RMSD) of VEGFR2 (C), Ligand RMSD (D), Radius of gyration (E), complexes SASA values (F); Root Mean Square fluctuation (RMSF) of protein backbone (G), number of H-bonds formed with compound **6** (H), and Residue-binding-free energy decomposition for the simulated complex (I). (J-K) Principal component analysis and free energy landscape of VEGFR2-compound **6** complex. (J) Eigenvalue distribution of the covariance matrix, illustrating the dominant modes of motion. (K) Time evolution of the projections along PC1 and PC2 over the 100-ns trajectory. Supplementary
